# Supplementary material
Source: PubMed Central journal article supplement (PMC7050633)
Supplement: NIHMS1560648-supplement-SI.pdf [file NIHMS1560648-supplement-SI.pdf]

Supporting Information for

**Nano Functionalized Stent Mediated Local Heat Treatment for  
the Suppression of Stent Induced Tissue Hyperplasia**

*Jung-Hoon Park,<sup>1, 2, 3+</sup> Wooram Park,<sup>3,4+</sup> Soojeong Cho,<sup>3</sup> Kun Yung Kim,<sup>1</sup> Jiaywei Tsauo,<sup>1</sup>  
Sung Hwan Yoon,<sup>1</sup> Woo Chan Son,<sup>5</sup> Dong-Hyun Kim,<sup>3,6\*</sup> and Ho-Young Song,<sup>1\*</sup>*

Departments of <sup>1</sup>Radiology and Research Institute of Radiology <sup>2</sup>Biomedical Engineering Research Center, and <sup>5</sup>Pathology, Asan Medical Center, University of Ulsan College of Medicine, 88, Olymic-ro 43-gil, Songpa-gu, Seoul, 05505, Republic of Korea.

<sup>3</sup>Department of Radiology, Feinberg School of Medicine, Northwestern University, Chicago, IL, 60611, USA.

<sup>4</sup> Department of Biomedical Science, College of Life Sciences, CHA University, 335 Pango-ro, Bundang-gu, Seongnam, Gyeonggi 13488, Republic of Korea.

<sup>6</sup>Robert H. Lurie Comprehensive Cancer Center, Chicago, IL, 60611, USA.

† These authors contributed equally to this work and are co-first authors.

\* Corresponding Authors: D. -H. K. (dhkim@northwestern.edu) and H. -Y. S. (hysong@amc.seoul.kr)

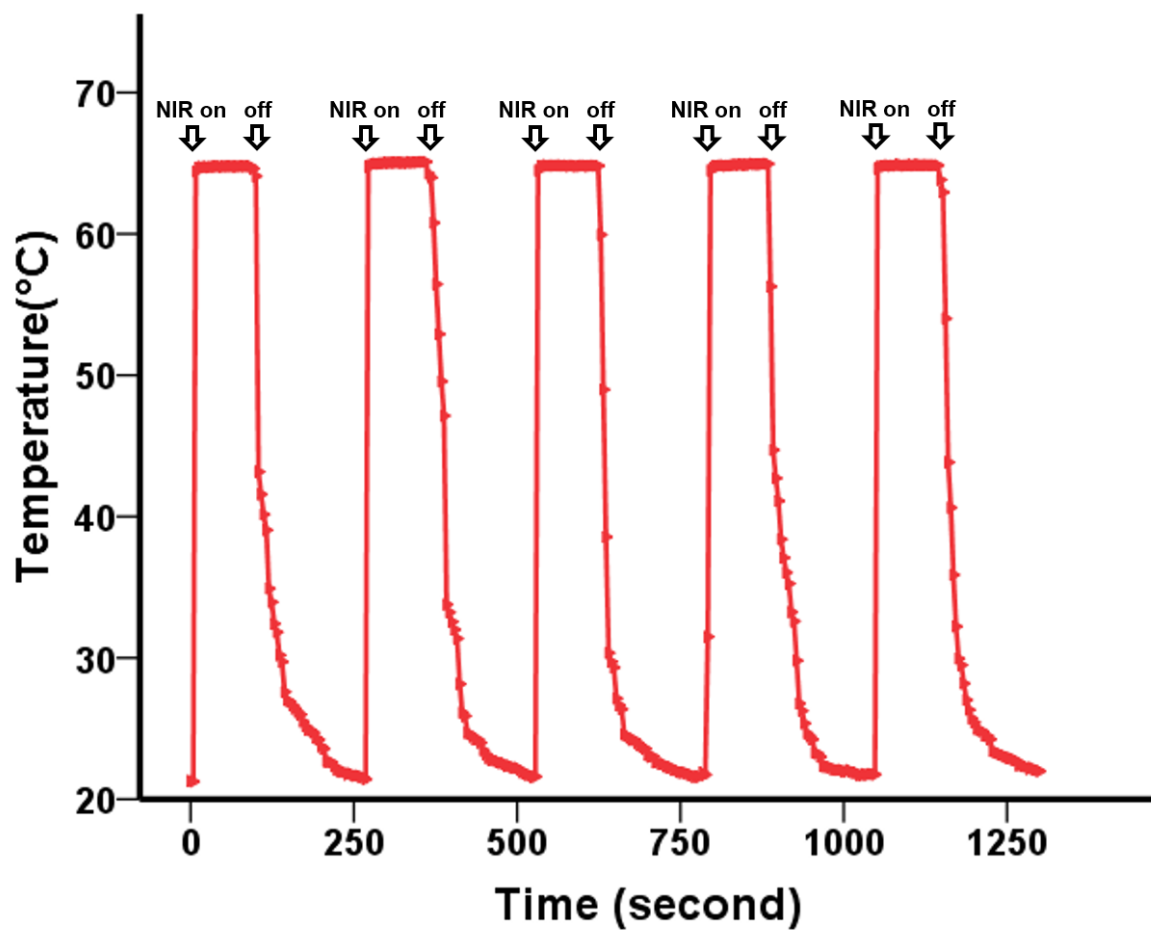

**Figure S1. Measurement of temperature change of BGNP-coated SEMS by repeated laser irradiation.** The temperature change of BGNP-coated SEMS was measured during five repeated irradiations with an 808-nm laser at 1.91 W/cm<sup>2</sup>.

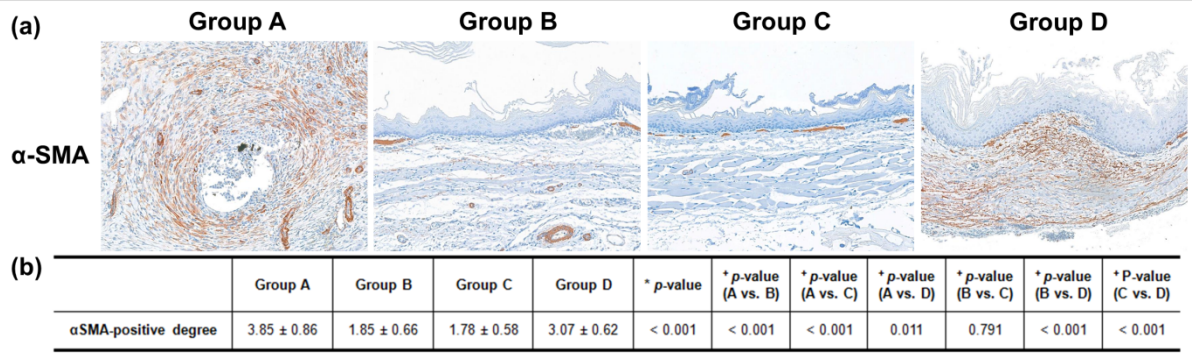

**Figure S2. Immunohistochemical analysis for re-epithelialization after BGNP-coated SEMS local heating.** (a) Alpha-smooth muscle actin ( $\alpha$ SMA) expression was significantly decreased in groups B and C compared to group A (magnification  $\times 20$ ).  $\alpha$ SMA expression was statistically greater in group D than in groups B and C. (b) A table of  $\alpha$ SMA expression of each group. Note: Data are presented as mean  $\pm$  standard deviation. \* Kruskal–Wallis test, + Mann–Whitney U test.
